# Supplementary material for: Oral and gut dysbiosis leads to functional alterations in Parkinson’s disease
Source: PubMed Central journal article supplement (PMC9262988; doi:10.1038/s41531-022-00351-6), 2022-07-07
Supplement: 41531_2022_351_MOESM1_ESM.pdf [file 41531_2022_351_MOESM1_ESM.pdf]

## Supplementary materials

Sungyang Jo, MD<sup>1,†</sup>; Woorim Kang, BS<sup>2,3,†</sup>; Yun Su Hwang, MD<sup>1</sup>; Seung Hyun Lee, MD<sup>1</sup>; Kye Won Park, MD<sup>4</sup>; Ja Yeon Do, BS<sup>1</sup>; Mi Sun Kim, RN, PhD<sup>1</sup>; Hyunna Lee, PhD<sup>5</sup>; Hyung Jeong Yoon, BS<sup>6</sup>; Yoo Kyung Park, PhD<sup>6</sup>; Mauricio Chalita, PhD<sup>3</sup>; Je Hee Lee, PhD<sup>3</sup>; Hojun Sung, BS<sup>2</sup>; Jae-Yun Lee, BS<sup>2</sup>; Jin-Woo Bae, PhD<sup>2</sup>; Sun Ju Chung MD, PhD<sup>1</sup>

**†These authors equally contributed to the manuscript**

**Supplementary Figure 1.** Study flowchart

**Supplementary Figure 2.** Comparison of alpha diversity indices between patients with Parkinson's disease (PD) and healthy controls (a) in the stool and (b) in oral samples using 16S rRNA sequencing

**Supplementary Figure 3.** Gut and oral microbiota associated with disease severity in Parkinson's disease (PD) using 16s rRNA sequencing.

**Supplementary Figure 4.** Correlation between clinical symptoms and gut microbial abundance

**Supplementary Figure 5.** Glutamate and arginine synthesis-associated pathway maps

**Supplementary Figure 6.** Variable importance of features in random forest classification models

**Supplementary Table 1.** Baseline clinical characteristics of patients with Parkinson's disease (PD) and healthy controls with complete stool sequencing data.

**Supplementary Table 2.** Baseline clinical characteristics of patients with Parkinson's disease (PD) and healthy controls with complete oral sequencing data.

**Supplementary Table 3.** Functional biomarkers of the oral microbiome using PICRUSt

**Supplementary Table 4.** Correlation between clinical symptoms and gut microbial abundance

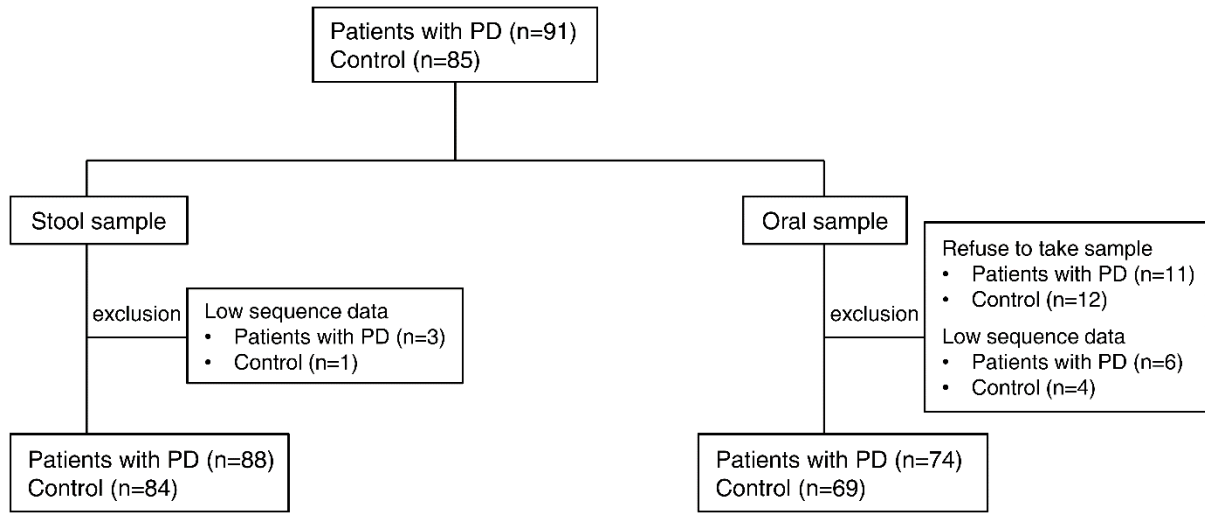

**Supplementary Figure 1.** Study flowchart.

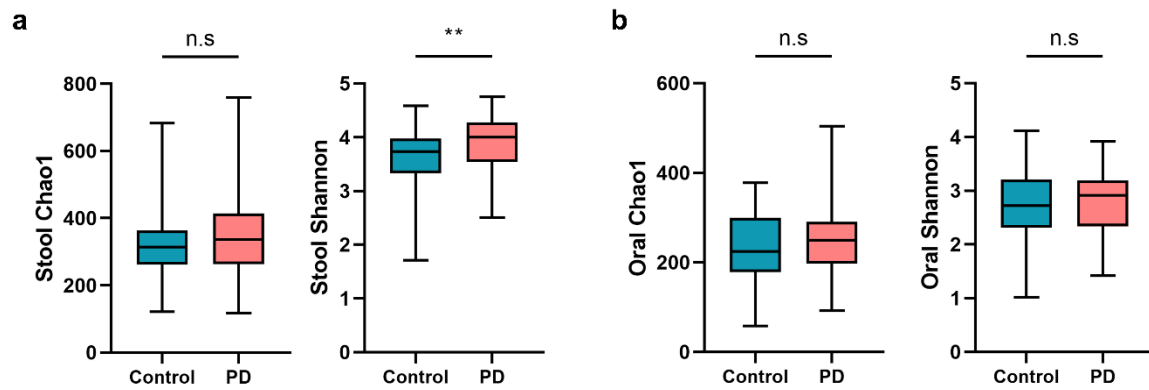

**Supplementary Figure 2.** Comparison of alpha diversity indices between patients with Parkinson's disease (PD) and healthy controls (a) in the stool and (b) in oral samples using 16S rRNA sequencing. Boxplot centerline represents the median (50th percentile). The top and bottom hinges represent 75th and 25th percentiles, respectively. The upper and lower whiskers correspond to the highest and lowest data points. n.s : not significant,  $*P < 0.05$ ,  $**P < 0.01$

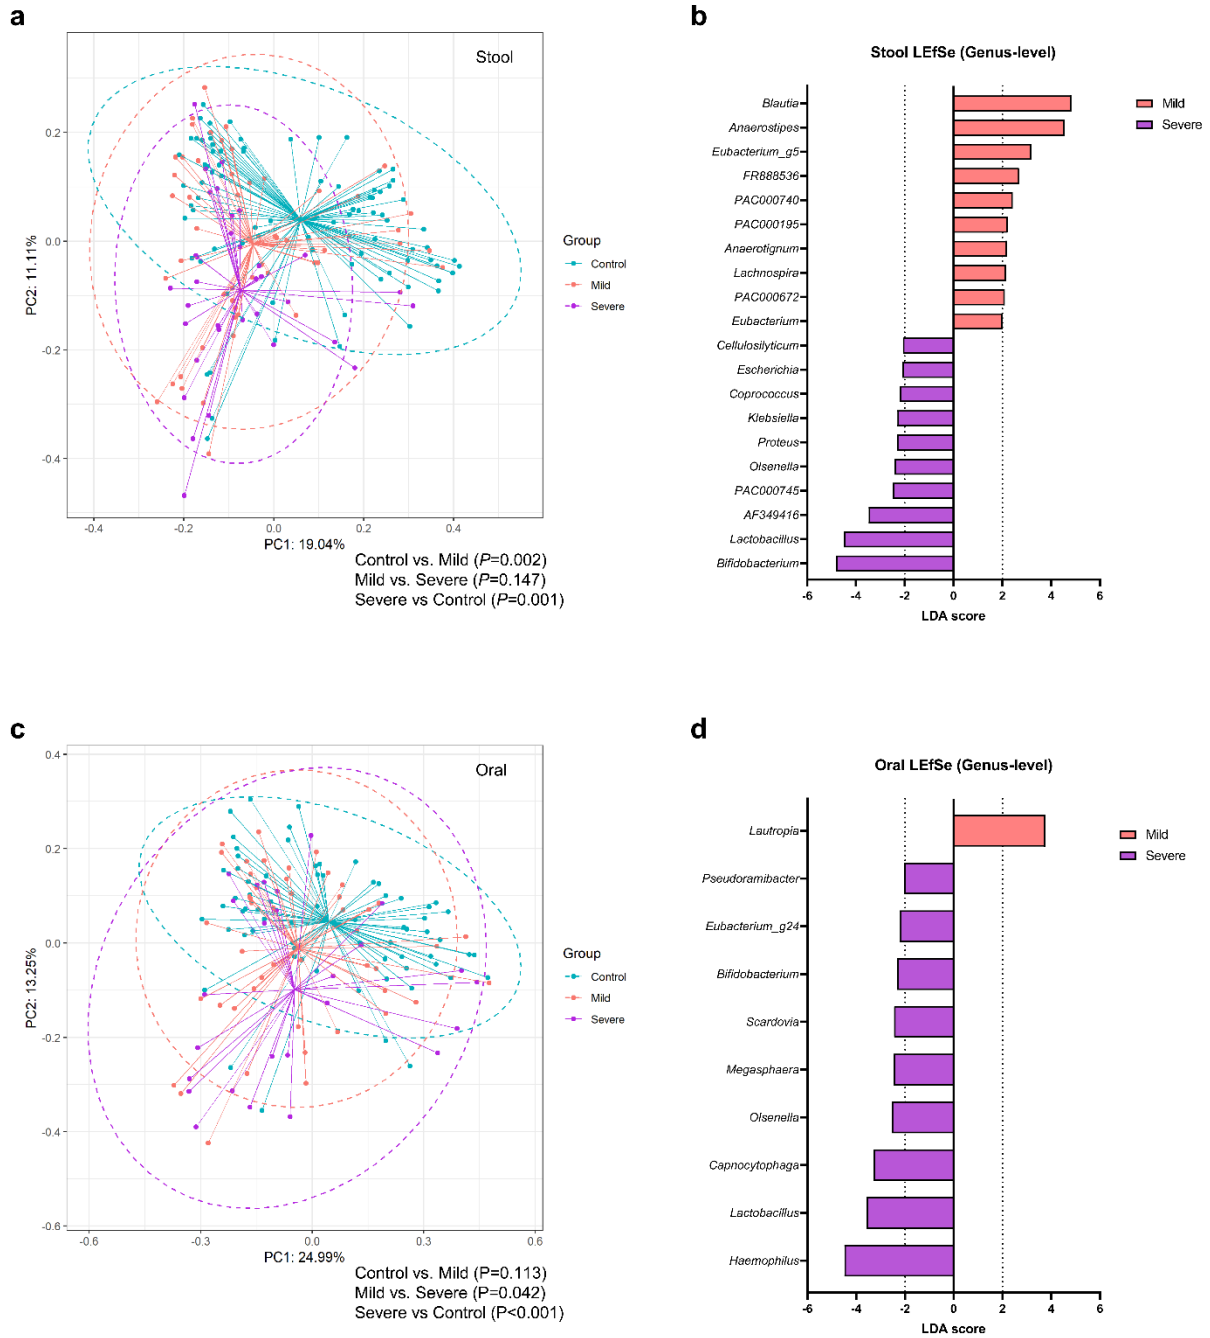

**Supplementary Figure 3.** Gut and oral microbiota associated with disease severity in Parkinson's disease (PD) using 16s rRNA sequencing. (a) Comparison of beta-diversity between mild PD, severe PD, and healthy controls for gut microbiome (b) Comparison of gut microbiome between mild PD and severe PD using LefSe analysis (c) Comparison of beta-diversity between mild PD, severe PD, and healthy controls for oral microbiome (d) Comparison of oral microbiome between mild PD and severe PD using LefSe analysis

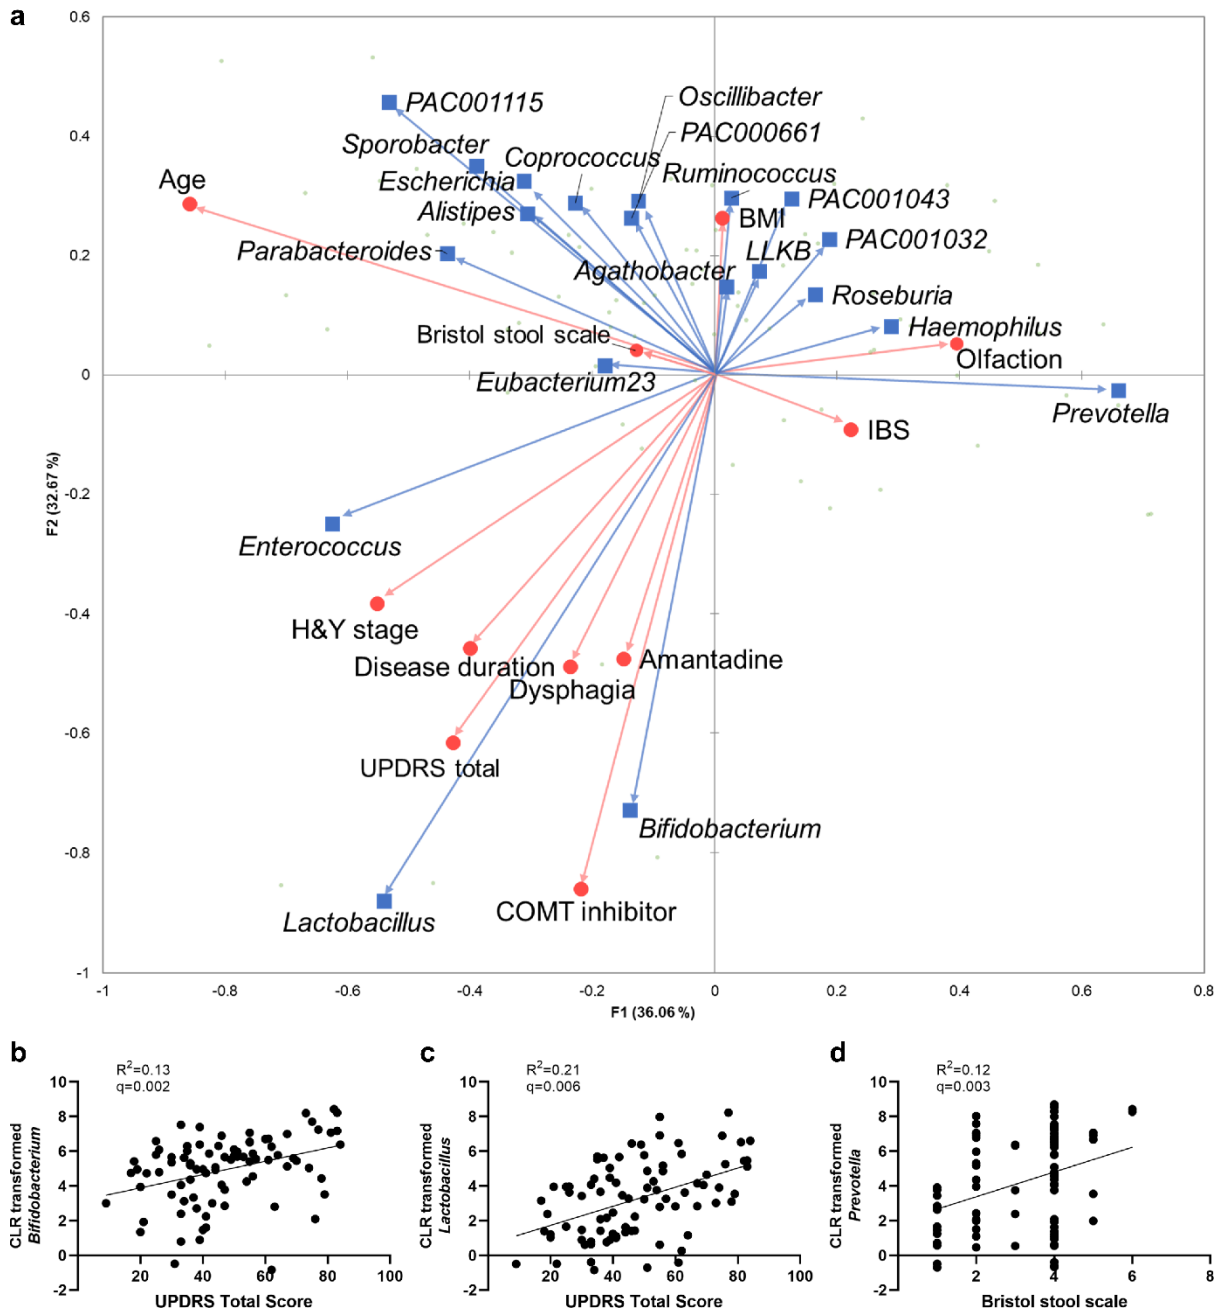

**Supplementary Figure 4.** Correlation between clinical symptoms and gut microbial abundance. (a) Canonical correlation analysis between Parkinson's disease-related clinical features and gut microbial abundance. (b-c) linear regression analysis between UPDRS and (b) stool *Bifidobacterium*, and (c) stool *Lactobacillus* (d) linear regression analysis between stool firmness and stool *Prevotella*.

**a** Glutamate and GABA biosynthesis (from ko00250, k00910)

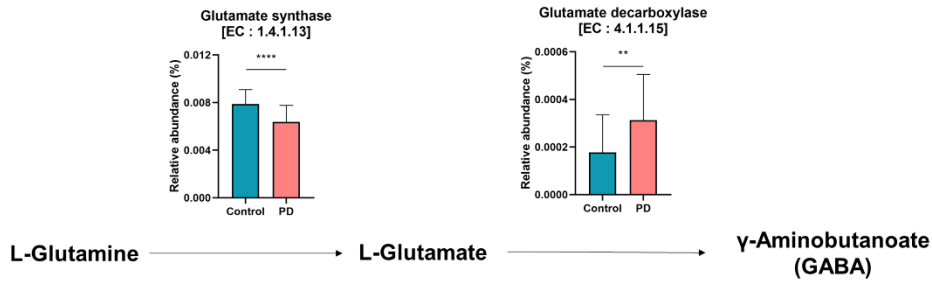

**b** Glutamate biosynthesis from carbohydrates (from ko00500, ko00010, ko00020, ko00020, 00250, ko00910)

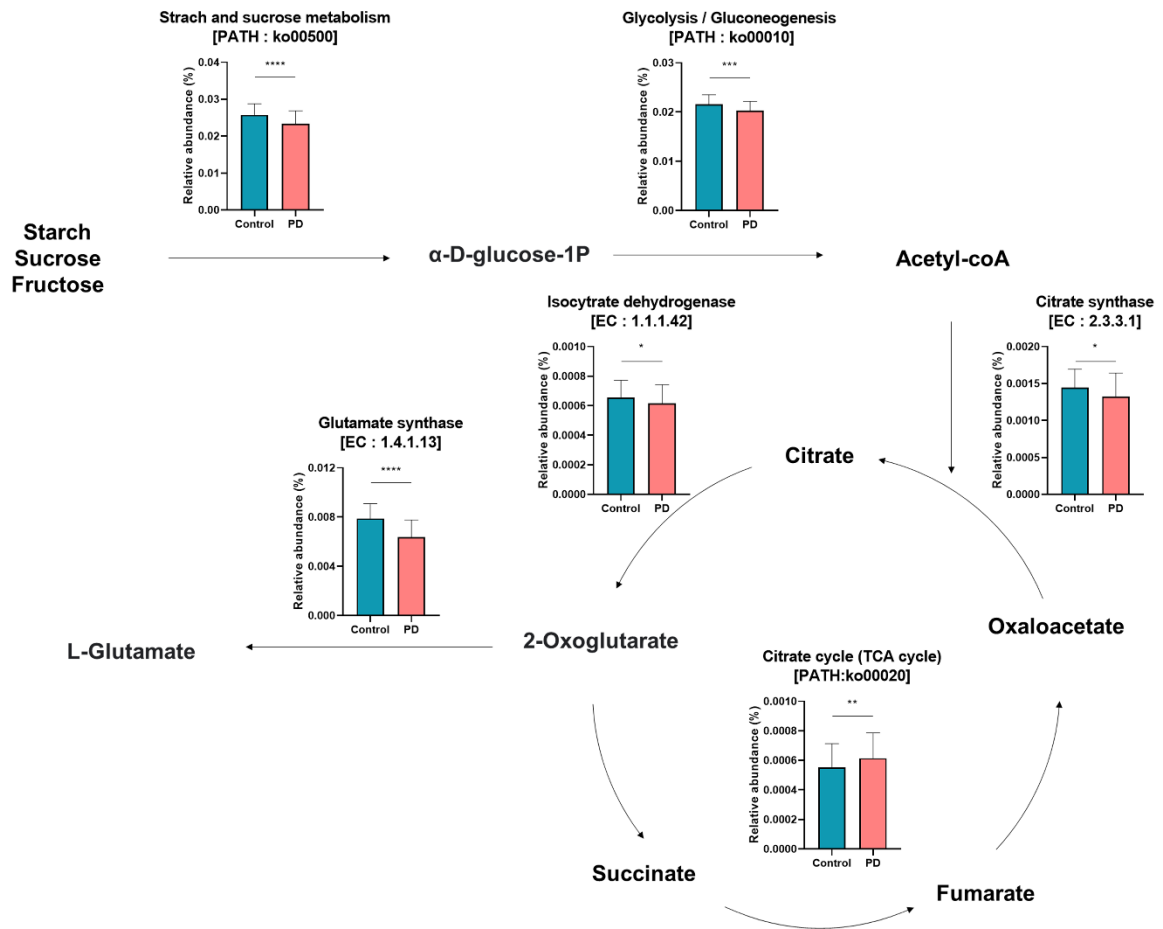

**c** Glutamate biosynthesis during purine metabolism (from ko00250)

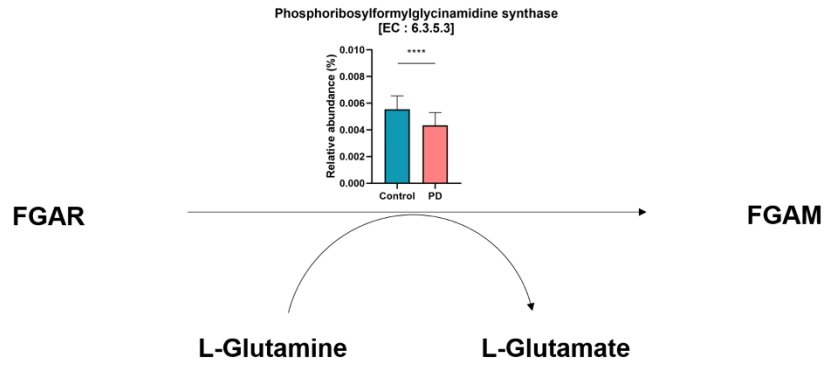

**d** Arginine biosynthesis (from ko00220, ko00910)

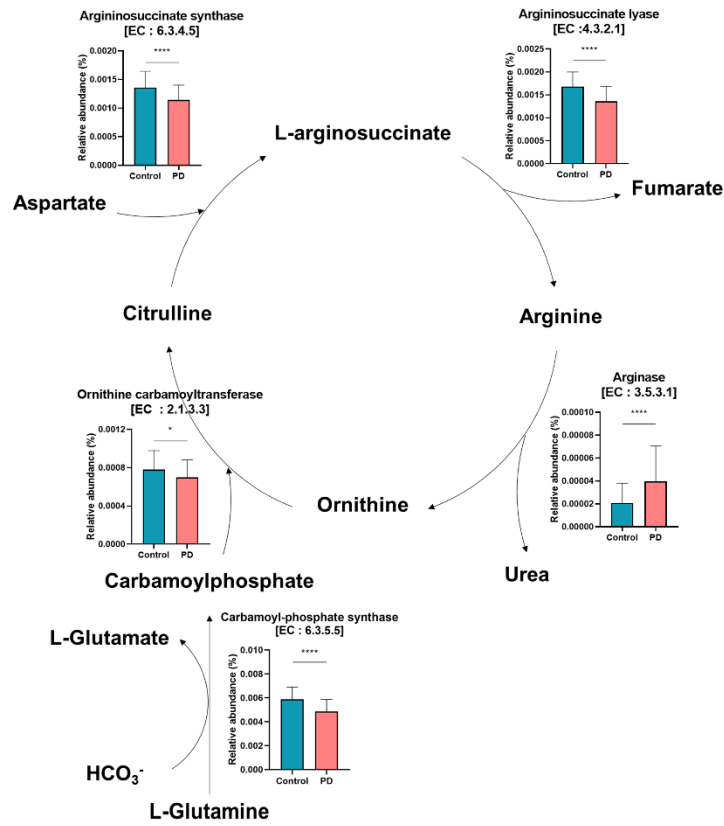

**Supplementary Figure 5.** Glutamate and arginine synthesis-associated pathway maps. Bar plots indicate mean abundance of genes and error bars represent standard deviation, \* $P < 0.05$ , \*\* $P < 0.01$ , \*\*\* $P < 0.001$ , \*\*\*\* $P < 0.0001$ .

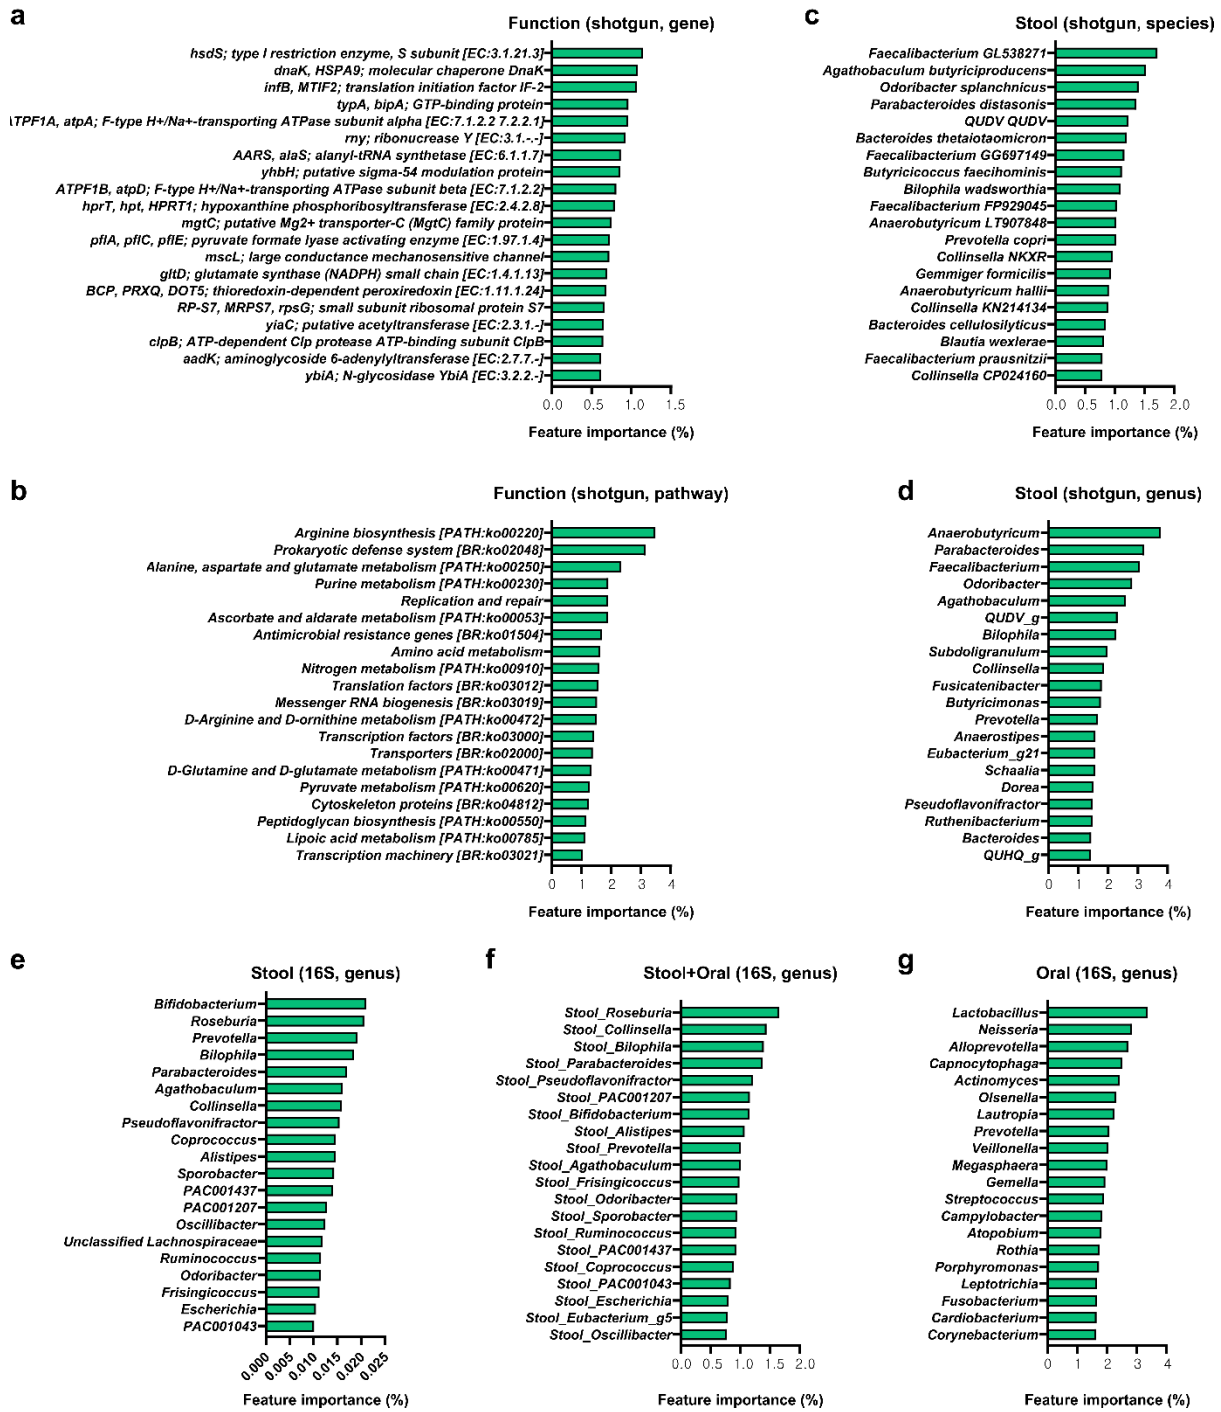

Supplementary Figure 6. Variable importance of features in random forest classification models.



**Supplementary Table 1.** Baseline clinical characteristics of patients with Parkinson’s disease (PD) and healthy controls with complete stool sequencing data.

|                          | <b>PD (n=88)</b> | <b>Controls (n=84)</b> | <b><i>p</i> value</b> |
|--------------------------|------------------|------------------------|-----------------------|
| Age, years               | 65.1 ± 7.8       | 64.7 ± 8.1             | 0.734                 |
| Male, n (%)              | 47 (53.4%)       | 39 (46.4%)             | 0.446                 |
| BMI, kg/m <sup>2</sup>   | 24.3 (22.2–26.2) | 23.9 (21.5–25.4)       | 0.106                 |
| Education, years         | 12.0 (12.0–16.0) | 12.0 (12.0–16.0)       | 0.980                 |
| <b>Clinical symptoms</b> |                  |                        |                       |
| IBS, n (%)               | 3 (3.4%)         | 3 (3.6%)               | 1.000                 |
| Constipation, n (%)      | 41 (46.6%)       | 10 (11.9%)             | <0.001                |
| Bristol                  | 4.0 (2.0– 4.0)   | 4.0 (4.0– 4.0)         | <0.001                |
| Swallowing test          | 0.0 (0.0– 3.0)   | 0.0 (0.0– 0.0)         | 0.003                 |
| Smell test               | 9.0 (6.0–10.0)   | 10.0 (10.0–10.0)       | <0.001                |
| Disease duration         | 2.5 (0.0– 6.5)   | -                      |                       |
| <b>UPDRS</b>             |                  |                        |                       |
| UPDRS part 1             | 5.0 (3.0– 7.0)   | -                      |                       |
| UPDRS part 2             | 7.0 (4.0–11.0)   |                        |                       |
| UPDRS part 3             | 32.0 (25.0–40.0) |                        |                       |
| UPDRS part 4             | 0.0 (0.0– 2.0)   |                        |                       |
| UPDRS total score        | 45.0 (34.5–60.5) |                        |                       |
| Hoehn and Yahr stage     | 2.0 (2.0– 3.0)   |                        |                       |
| <b>Medication for PD</b> |                  |                        |                       |
| Levodopa use, n (%)      | 73 (83.0%)       | -                      |                       |

|                                        |                     |                |       |
|----------------------------------------|---------------------|----------------|-------|
| Dopamine agonist, n (%)                | 34 (38.6%)          | -              |       |
| COMT inhibitor, n (%)                  | 7 (8.0%)            | -              |       |
| MAO-B inhibitor, n (%)                 | 25 (28.4%)          | -              |       |
| Amantadine, n (%)                      | 19 (21.6%)          | -              |       |
| Levodopa equivalent<br>daily dose (mg) | 455.0 (300.0–822.2) | -              |       |
| Daily dietary intake                   | (n=80)              | (n=77)         |       |
| Total energy (kCal)                    | 2183.0 ± 503.8      | 2154.8 ± 568.2 | 0.743 |
| Carbohydrate (g)                       | 297.7 ± 68.8        | 287.9 ± 80.0   | 0.415 |
| Protein (g)                            | 88.9 ± 26.0         | 88.8 ± 25.3    | 0.975 |
| - animal source                        | 47.9 ± 15.3         | 47.1 ± 16.6    | 0.758 |
| - plant source                         | 41.0 ± 16.7         | 41.7 ± 16.4    | 0.806 |
| Fat intake (g)                         | 69.5 ± 26.3         | 67.7 ± 24.3    | 0.665 |
| - animal source                        | 41.0 ± 19.8         | 38.8 ± 18.5    | 0.482 |
| - plant source                         | 28.5 ± 13.1         | 28.9 ± 12.9    | 0.847 |
| Fiber (g)                              | 39.0 ± 17.0         | 38.0 ± 17.7    | 0.727 |
| - Soluble fiber                        | 5.1 ± 2.5           | 5.1 ± 2.4      | 0.959 |
| - Insoluble fiber                      | 19.1 ± 8.1          | 19.2 ± 8.6     | 0.944 |

**Supplementary Table 2.** Baseline clinical characteristics of patients with Parkinson’s disease (PD) and healthy controls with complete oral sequencing data.

|                         | <b>PD (n=74)</b> | <b>Controls (n=69)</b> | <b><i>p</i> value</b> |
|-------------------------|------------------|------------------------|-----------------------|
| Age, years              | 65.0 ± 7.6       | 64.9 ± 7.5             | 0.911                 |
| Male, n (%)             | 42 (56.8%)       | 33 (47.8%)             | 0.368                 |
| BMI, kg/m <sup>2</sup>  | 24.3 (22.3–26.3) | 24.1 (22.0–25.7)       | 0.492                 |
| Education, years        | 12.0 (12.0–16.0) | 12.0 (10.5–16.0)       | 0.915                 |
| Clinical symptoms       |                  |                        |                       |
| IBS, n (%)              | 2 (2.7%)         | 2 (2.9%)               | 1.000                 |
| Constipation, n (%)     | 34 (45.9%)       | 8 (11.6%)              | <0.001                |
| Bristol                 | 4.0 (2.0– 4.0)   | 4.0 (4.0– 4.0)         | <0.001                |
| Swallowing test         | 0.0 (0.0– 3.0)   | 0.0 (0.0– 0.0)         | 0.008                 |
| Smell test              | 9.5 (6.0–10.0)   | 10.0 (10.0–10.0)       | <0.001                |
| Disease duration        | 2.0 (0.0– 6.0)   | -                      |                       |
| UPDRS                   |                  |                        |                       |
| UPDRS part 1            | 5.0 (3.0– 8.0)   | -                      |                       |
| UPDRS part 2            | 7.0 (3.0–11.0)   |                        |                       |
| UPDRS part 3            | 32.0 (23.0–41.0) |                        |                       |
| UPDRS part 4            | 0.0 (0.0– 0.0)   |                        |                       |
| UPDRS total score       | 43.0 (34.0–61.0) |                        |                       |
| Hoehn and Yahr stage    | 2.0 (2.0– 3.0)   |                        |                       |
| Medication for PD       |                  |                        |                       |
| Levodopa use, n (%)     | 59 (79.7%)       | -                      |                       |
| Dopamine agonist, n (%) | 28 (37.8%)       | -                      |                       |

|                                        |                     |                |       |
|----------------------------------------|---------------------|----------------|-------|
| COMT inhibitor, n (%)                  | 4 (5.4%)            | -              |       |
| MAO-B inhibitor, n (%)                 | 21 (28.4%)          | -              |       |
| Amantadine, n (%)                      | 12 (16.2%)          | -              |       |
| Levodopa equivalent<br>daily dose (mg) | 450.0 (200.0–712.5) | -              |       |
| Daily dietary intake                   | (n=68)              | (n=64)         |       |
| Total energy (kCal)                    | 2184.8 ± 501.5      | 2230.7 ± 571.6 | 0.624 |
| Carbohydrate (g)                       | 296.9 ± 72.5        | 297.2 ± 79.6   | 0.980 |
| Protein (g)                            | 89.7 ± 26.2         | 91.4 ± 25.6    | 0.707 |
| - animal source                        | 47.5 ± 15.9         | 48.6 ± 17.1    | 0.702 |
| - plant source                         | 42.2 ± 16.7         | 42.8 ± 16.5    | 0.836 |
| Fat intake (g)                         | 68.5 ± 26.2         | 69.6 ± 24.8    | 0.803 |
| - animal source                        | 39.8 ± 20.2         | 40.3 ± 19.4    | 0.889 |
| - plant source                         | 28.7 ± 12.4         | 29.3 ± 12.7    | 0.774 |
| Fiber (g)                              | 38.9 ± 17.1         | 39.6 ± 18.6    | 0.806 |
| - Soluble fiber                        | 5.2 ± 2.5           | 5.3 ± 2.5      | 0.733 |
| - Insoluble fiber                      | 19.0 ± 8.1          | 19.9 ± 9.0     | 0.575 |

**Supplementary Table 3.** Functional biomarkers of the oral microbiome using PICRUSt

| Ortholog | Definition                                                                     | Pathway                                                                                                      | Module             | p-value  | FDR      |        |         |
|----------|--------------------------------------------------------------------------------|--------------------------------------------------------------------------------------------------------------|--------------------|----------|----------|--------|---------|
|          |                                                                                |                                                                                                              |                    |          | q-value  | PD     | Control |
|          | beta-glucoside operon transcriptional antiterminator                           |                                                                                                              |                    | 0.000208 | 0.234752 | 0.0316 | 0.0252  |
| K02199   | cytochrome c biogenesis protein CcmG, thiol:disulfide interchange protein DsbE |                                                                                                              |                    | 0.000304 | 0.234752 | 0.0447 | 0.0533  |
|          |                                                                                | ko00010,<br>ko00260,<br>ko00680,<br>ko01100,<br>ko01110,<br>ko01120,<br>ko01130, M00001,<br>ko01200, M00002, |                    |          |          |        |         |
| K15634   | probable phosphoglycerate mutase                                               | ko01230                                                                                                      | M00003             | 0.000569 | 0.234752 | 0.0326 | 0.0225  |
| K06188   | aquaporin Z                                                                    |                                                                                                              |                    | 0.000613 | 0.234752 | 0.0239 | 0.0301  |
| K06962   | uncharacterized protein                                                        |                                                                                                              |                    | 0.000641 | 0.234752 | 0.0211 | 0.0159  |
| K03546   | DNA repair protein SbcC/Rad50                                                  |                                                                                                              |                    | 0.000811 | 0.234752 | 0.0406 | 0.035   |
|          |                                                                                | ko00500,                                                                                                     |                    |          |          |        |         |
| K00689   | dextranucrase                                                                  | ko02020                                                                                                      |                    | 0.000847 | 0.234752 | 0.0661 | 0.0371  |
| K07493   | putative transposase                                                           |                                                                                                              |                    | 0.000859 | 0.234752 | 0.0491 | 0.0325  |
| K15539   | cytoskeleton protein RodZ                                                      |                                                                                                              |                    | 0.001022 | 0.234752 | 0.0344 | 0.0407  |
|          | phospholipid/cholesterol/gamma-HCH transport system ATP-binding protein        |                                                                                                              | M00210,<br>M00669, |          |          |        |         |
| K02065   | protein                                                                        | ko02010                                                                                                      | M00670             | 0.001022 | 0.234752 | 0.0651 | 0.0733  |
|          | bacterial/archaeal transporter family                                          |                                                                                                              |                    |          |          |        |         |
| K08978   | protein                                                                        |                                                                                                              |                    | 0.001582 | 0.234752 | 0.0401 | 0.0513  |
| K19225   | rhomoid protease GluP                                                          |                                                                                                              |                    | 0.001998 | 0.234752 | 0.0338 | 0.0277  |
| K05988   | dextranase                                                                     | ko00500                                                                                                      |                    | 0.002025 | 0.234752 | 0.0134 | 0.0078  |

|        |                                                                                                    |                                                                      |          |          |          |          |        |        |
|--------|----------------------------------------------------------------------------------------------------|----------------------------------------------------------------------|----------|----------|----------|----------|--------|--------|
| K13732 | fibronectin-binding protein A                                                                      | ko05100                                                              |          | 0.002546 | 0.234752 | 0.0149   | 0.0092 |        |
| K21125 | mucin-5AC                                                                                          | ko04657                                                              |          | 0.002869 | 0.234752 | 0.0235   | 0.0166 |        |
| K06148 | ATP-binding cassette, subfamily C,<br>bacterial                                                    |                                                                      |          | 0.003105 | 0.234752 | 0.0719   | 0.063  |        |
| K19736 | TetR/AcrR family transcriptional<br>regulator, regulator of autoinduction<br>and epiphytic fitness |                                                                      |          | 0.003676 | 0.236216 | 0.0224   | 0.0171 |        |
| K03646 | colicin import membrane protein                                                                    |                                                                      |          | 0.003871 | 0.236216 | 0.0687   | 0.074  |        |
| K06196 | cytochrome c-type biogenesis protein                                                               |                                                                      |          | 0.003871 | 0.236216 | 0.0902   | 0.102  |        |
| K09765 | epoxyqueuosine reductase                                                                           |                                                                      |          | 0.004074 | 0.236216 | 0.0308   | 0.0369 |        |
| K17320 | putative aldouronate transport system<br>permease protein                                          | ko02010                                                              | M00603   | 0.004127 | 0.236216 | 0.0203   | 0.026  |        |
| K02477 | two-component system, LytTR<br>family, response regulator                                          |                                                                      |          | 0.004745 | 0.241451 | 0.0284   | 0.0235 |        |
| K17318 | putative aldouronate transport system<br>substrate-binding protein                                 | ko02010                                                              | M00603   | 0.004805 | 0.241451 | 0.0211   | 0.0273 |        |
| K12541 | ATP-binding cassette, subfamily C,<br>bacterial LapB                                               | ko02010                                                              | M00330   | 0.005052 | 0.241852 | 0.0217   | 0.0281 |        |
| K07029 | diacylglycerol kinase (ATP)<br>thiamine-phosphate                                                  | ko01110                                                              |          | 0.005052 | 0.241852 | 0.0413   | 0.0341 |        |
| K00788 | pyrophosphorylase                                                                                  | ko00730,                                                             | ko01100, | 0.005513 | 0.244934 | 0.0538   | 0.059  |        |
| K06950 | uncharacterized protein                                                                            | ko01100                                                              | M00127   | 0.005513 | 0.244934 | 0.0345   | 0.0278 |        |
| K12373 | hexosaminidase                                                                                     | ko00511,<br>ko00513,<br>ko00520,<br>ko00531,<br>ko00603,<br>ko00604, | ko01100, | M00079   | 0.006238 | 0.259034 | 0.0684 | 0.0826 |

|        |                                                 |  |          |        |         |          |          |        |        |
|--------|-------------------------------------------------|--|----------|--------|---------|----------|----------|--------|--------|
|        |                                                 |  |          |        | ko04142 |          |          |        |        |
|        | polysaccharide biosynthesis transport           |  |          |        |         |          |          |        |        |
| K16554 | protein                                         |  | ko05111  |        |         | 0.006472 | 0.261413 | 0.0366 | 0.0417 |
| K03547 | DNA repair protein SbcD/Mre11                   |  |          |        |         | 0.006795 | 0.262681 | 0.0357 | 0.0299 |
| K15923 | alpha-L-fucosidase 2                            |  | ko00511  |        |         | 0.007577 | 0.273064 | 0.0186 | 0.0242 |
|        | neurotransmitter:Na <sup>+</sup> symporter, NSS |  |          |        |         |          |          |        |        |
| K03308 | family                                          |  |          |        |         | 0.007577 | 0.273064 | 0.0551 | 0.0624 |
| K19334 | biofilm protein TabA                            |  |          |        |         | 0.00824  | 0.277262 | 0.0276 | 0.0331 |
|        | two-component system, sensor                    |  |          |        |         |          |          |        |        |
| K07718 | histidine kinase YesM                           |  | ko02020  | M00519 |         | 0.00824  | 0.277262 | 0.045  | 0.0556 |
|        | cyclomaltodextrinase / maltogenic               |  |          |        |         |          |          |        |        |
| K01208 | alpha-amylase / neopullulanase                  |  | ko01100  |        |         | 0.008539 | 0.277262 | 0.0235 | 0.0291 |
| K07494 | putative transposase                            |  |          |        |         | 0.008641 | 0.279278 | 0.029  | 0.0378 |
| K01286 | D-alanyl-D-alanine carboxypeptidase             |  |          |        |         | 0.008744 | 0.280666 | 0.0296 | 0.0221 |
|        | 5-methylthioadenosine/S-                        |  |          |        |         |          |          |        |        |
| K12960 | adenosylhomocysteine deaminase                  |  | ko01100  |        |         | 0.008849 | 0.28079  | 0.0494 | 0.0619 |
| K01436 | amidohydrolase                                  |  |          |        |         | 0.008849 | 0.28079  | 0.0514 | 0.0428 |
| K06199 | fluoride exporter                               |  |          |        |         | 0.009498 | 0.285211 | 0.0686 | 0.076  |
| K16692 | tyrosine-protein kinase Etk/Wzc                 |  |          |        |         | 0.009723 | 0.286882 | 0.0226 | 0.017  |
|        | hemoglobin/transferrin/lactoferrin              |  |          |        |         |          |          |        |        |
| K16087 | receptor protein                                |  |          |        |         | 0.012255 | 0.286882 | 0.0362 | 0.0496 |
| K01448 | N-acetylmuramoyl-L-alanine amidase              |  | ko01503  | M00727 |         | 0.013727 | 0.288501 | 0.0802 | 0.066  |
| K07238 | zinc transporter, ZIP family                    |  |          |        |         | 0.015354 | 0.296986 | 0.0265 | 0.0201 |
| K12996 | rhamnosyltransferase                            |  |          |        |         | 0.015525 | 0.298433 | 0.0282 | 0.0226 |
|        |                                                 |  | ko00052, |        |         |          |          |        |        |
|        |                                                 |  | ko00511, |        |         |          |          |        |        |
|        |                                                 |  | ko00600, |        |         |          |          |        |        |
| K01190 | beta-galactosidase                              |  | ko01100  |        |         | 0.01696  | 0.304242 | 0.0687 | 0.0786 |
|        | PTS system, cellobiose-specific IIC             |  |          |        |         |          |          |        |        |
| K02761 | component                                       |  | ko02060  | M00275 |         | 0.019753 | 0.319929 | 0.0292 | 0.0231 |
|        | putative hydrolase of the HAD                   |  |          |        |         |          |          |        |        |
| K07025 | superfamily                                     |  |          |        |         | 0.020621 | 0.324901 | 0.0848 | 0.0761 |

|        |                                       |          |         |          |          |        |        |
|--------|---------------------------------------|----------|---------|----------|----------|--------|--------|
|        | thiol:disulfide interchange protein   |          |         |          |          |        |        |
| K03673 | DsbA                                  | ko01503  | M00728  | 0.021522 | 0.324901 | 0.0152 | 0.0197 |
|        | ATP-binding cassette, subfamily B,    |          |         |          |          |        |        |
| K06147 | bacterial                             |          |         | 0.021522 | 0.324901 | 0.3676 | 0.341  |
|        | N-acetylglucosamine-6-phosphate 2-    |          |         |          |          |        |        |
| K01788 | epimerase                             | ko00520  |         | 0.021753 | 0.326271 | 0.0516 | 0.0602 |
|        |                                       | ko00511, |         |          |          |        |        |
|        |                                       | ko00600, |         |          |          |        |        |
| K01186 | sialidase-1                           | ko04142  |         | 0.022221 | 0.328618 | 0.0575 | 0.0712 |
|        | endo-alpha-N-                         |          |         |          |          |        |        |
| K17624 | acetylgalactosaminidase               |          |         | 0.022458 | 0.328618 | 0.027  | 0.0336 |
| K19302 | undecaprenyl-diphosphatase            | ko00550  |         | 0.022458 | 0.328618 | 0.0665 | 0.0613 |
|        |                                       | ko00750, |         |          |          |        |        |
|        |                                       | ko01100, |         |          |          |        |        |
| K00275 | pyridoxamine 5'-phosphate oxidase     | ko01120  | M00124  | 0.022939 | 0.332302 | 0.0155 | 0.0202 |
|        |                                       | ko00230, |         |          |          |        |        |
|        |                                       | ko00240, |         |          |          |        |        |
|        |                                       | ko00760, |         |          |          |        |        |
|        |                                       | ko01100, |         |          |          |        |        |
| K01081 | 5'-nucleotidase                       | ko01110  |         | 0.023428 | 0.334548 | 0.059  | 0.0476 |
|        | thiaminase (transcriptional activator | ko00730, |         |          |          |        |        |
| K03707 | TenA)                                 | ko01100  |         | 0.025215 | 0.345598 | 0.0335 | 0.0396 |
|        | ATP-binding cassette, subfamily C,    | ko02010, |         |          |          |        |        |
| K20344 | bacteriocin exporter                  | ko02024  |         | 0.025215 | 0.345598 | 0.0252 | 0.0168 |
|        | peptide methionine sulfoxide          |          |         |          |          |        |        |
| K12267 | reductase msrA/msrB                   |          |         | 0.026288 | 0.351448 | 0.0733 | 0.0798 |
|        |                                       | ko00230, |         |          |          |        |        |
|        |                                       | ko00250, |         |          |          |        |        |
|        |                                       | ko01100, |         |          |          |        |        |
|        |                                       | ko01110, | M00048, |          |          |        |        |
| K01756 | adenylosuccinate lyase                | ko01130  | M00049  | 0.026288 | 0.351448 | 0.0961 | 0.1061 |
| K00812 | aspartate aminotransferase            | ko00220, |         | 0.027971 | 0.362763 | 0.0604 | 0.0548 |





|        |                                       |          |        |          |          |        |        |  |
|--------|---------------------------------------|----------|--------|----------|----------|--------|--------|--|
|        | family, response regulator AgrA       | ko02024  |        |          |          |        |        |  |
|        | two-component system, LytTR           | ko02020, |        |          |          |        |        |  |
| K07706 | family, sensor histidine kinase AgrC  | ko02024  | M00495 | 0.03602  | 0.407602 | 0.0581 | 0.0384 |  |
| K07487 | transposase                           |          |        | 0.037107 | 0.412455 | 0.0641 | 0.0523 |  |
| K07124 | uncharacterized protein               |          |        | 0.037476 | 0.413595 | 0.0584 | 0.054  |  |
|        |                                       | ko00270, |        |          |          |        |        |  |
|        |                                       | ko00450, |        |          |          |        |        |  |
|        | 5-                                    | ko01100, |        |          |          |        |        |  |
|        | methyltetrahydropteroyltriglutamate-  | ko01110, |        |          |          |        |        |  |
| K00549 | -homocysteine methyltransferase       | ko01230  | M00017 | 0.040538 | 0.430093 | 0.0936 | 0.086  |  |
| K03496 | chromosome partitioning protein       |          |        | 0.044662 | 0.444841 | 0.0807 | 0.0741 |  |
|        | sulfur-carrier protein                |          |        |          |          |        |        |  |
| K21147 | adenylyltransferase/sulfurtransferase | ko04122  |        | 0.045528 | 0.446162 | 0.0422 | 0.0477 |  |

**Supplementary Table 4.** Correlation between clinical symptoms and gut microbial abundance

| <b>Feature</b>   | <b>Bacteria</b> | <b>R square</b> | <b>P value</b> | <b>Q value</b> |
|------------------|-----------------|-----------------|----------------|----------------|
| UPDRS            | Lactobacillus   | 0.21448         | 0.00002        | 0.0006         |
| H&Y stage        | Lactobacillus   | 0.2122          | 0.00002        | 0.0006         |
| COMT inhibitor   | Lactobacillus   | 0.1821          | 0.00002        | 0.0016         |
| COMT inhibitor   | Bifidobacterium | 0.1721          | 0.00002        | 0.0016         |
| Age              | Prevotella      | 0.1521          | 0.00003        | 0.0016         |
| UPDRS            | Bifidobacterium | 0.1352          | 0.00003        | 0.0016         |
| Bristol scale    | Prevotella      | 0.1318          | 0.00005        | 0.003          |
| H&Y stage        | Bifidobacterium | 0.1292          | 0.00005        | 0.003          |
| Constipation     | Prevotella      | 0.12456         | 0.00007        | 0.003          |
| Age              | Prevotella      | 0.1193          | 0.00012        | 0.0057         |
| Dysphagia        | Bifidobacterium | 0.1012          | 0.0003         | 0.012          |
| Dysphagia        | PAC001043       | 0.08509         | 0.00068        | 0.0155         |
| Disease duration | Bifidobacterium | 0.08401         | 0.00071        | 0.0163         |
| Age              | Parabacteroides | 0.07936         | 0.0009         | 0.018          |
| UPDR             | PAC001043       | 0.07054         | 0.0014         | 0.0258         |
| Age              | Alistipes       | 0.06702         | 0.00167        | 0.0286         |
| Amantadine       | Lactobacillus   | 0.06343         | 0.00201        | 0.0301         |
| Olfaction        | Ruminococcus    | 0.0598          | 0.00241        | 0.0321         |
| Disease duration | Lactobacillus   | 0.05773         | 0.00268        | 0.0338         |
| H&Y stage        | PAC001043       | 0.05613         | 0.0029         | 0.0348         |
| Dysphagia        | Roseburia       | 0.05288         | 0.00343        | 0.0376         |
| Dysphagia        | Lactobacillus   | 0.05264         | 0.00347        | 0.0378         |
| COMT inhibitor   | Oscillibacter   | 0.05187         | 0.00361        | 0.0392         |
| H&Y stage        | Sporobacter     | 0.04736         | 0.00454        | 0.0454         |
